# Supplementary material
Source: Springer Nature journal article supplement (https://www.springermedizin.de/resource/supplementary/12979_2005_27_MOESM2_ESM.pdf/9603220)
Supplement: MOESM2 [file 9603220]

PD 15

PD 45



— IL-1 $\alpha$

Detailed description: This is the top Western blot panel. It shows two lanes. The left lane (PD 15) has a very faint, almost invisible band. The right lane (PD 45) has a prominent, dark, and somewhat diffuse band, indicating a significant increase in IL-1 $\alpha$  protein levels over time.



— ACTIN

Detailed description: This is the bottom Western blot panel, used as a loading control. It shows two lanes. Both the left (PD 15) and right (PD 45) lanes show a strong, dark, and consistent band, indicating that the protein loading was equal in both samples.
